# Supplementary material
Source: Elsevier journal article supplement (https://www.sciencedirect.com/science/article/pii/S0001731023000480)
Supplement: mmc2 [file S0001731023000480:mmc2.pdf]

## ANEXO 2:

---

### Encuesta final

#### CUESTIONARIO DERMATOLOGÍA

- 1.-Edad:
- 2.-Sexo: hombre mujer
- 3.-Nota media de expediente (aproximada):
- 4.-Cual es tu nivel de asistencia a clase en general y de Dermatología:  
General                      Dermatología:  
<25%                          <25%  
25-50%                        25-50%  
50-75%                        50-75%  
>75%                          >75%
- 5.-¿Consideras que la guía docente ha respondido a las expectativas de esta asignatura?  
Si  
No  
No la he leído
- 6.-Según has leído en la guía docente, ¿crees que es necesario acudir a todas las clases de dermatología?  
Si  
No  
No la he leído
- 7.-¿Crees adecuado el proceso de evaluación continua que se propone?  
Si  
No
- 8.-¿Te parecen apropiadas las herramientas que se han facilitado para el estudio de la asignatura (libro de casos clínicos, imágenes, enlaces a recursos webs.)?  
Si  
No
- 9.-¿Consideras que las tutorías han sido útiles para el aprendizaje de la asignatura?  
Si  
No
- 10.-Tu experiencia en seminarios de Dermatología ha sido:  
Solo asisto porque son obligatorios  
Participativos  
Útiles  
Similares a clases teóricas  
Prácticos
- 11.-¿Consideras que la dermatología es fundamental para la formación integral de un médico?  
Si  
No
- 12.-¿Te gusta la dermatología como opción profesional?  
Si  
No
- 13.- ¿Se ha correspondido la asignatura con la visión que tenias de ella antes de empezar?
- 14.-¿Se han cubierto tus expectativas?
- 15.- ¿Se han superado tus miedos?

16.- En relación a las siguientes afirmaciones marque de 1a 5 (1= muy en desacuerdo, 2= en desacuerdo, 3= neutral, 4 = de acuerdo y 5 = muy de acuerdo)

Las enfermedades de la piel:

Son un motivo frecuente de consulta: 12345

Difícilmente controlables: 12345

La mayoría son incurables: 1 2345

Normalmente nos indican solo patología cutánea: 12345

Son muy contagiosas 12345

La mayoría pican y escuecen: 12345

Implican gran afectación psíquica 1234 5

El diagnóstico clínico es complejo: 12345

Salvo el cáncer cutáneo la mayoría son banales: 12345

Gran parte de la patología puede ser tratada y diagnosticada por médicos no especialistas: 1 2345

Gran parte de la patología puede ser tratada y diagnosticada por profesiones afines no médicas: 12345

Los estilos de vida pueden influir en las enfermedades cutáneas: 12345

Me resultaría desagradable su exploración: 12345

Los dermatólogos:

Tienen una gran consideración entre los médicos de otras especialidades: 12345

Tiene gran reconocimiento social (población general/pacientes): 12345

Tienen un mayor grado de responsabilidad comparado con otros especialistas: 12345

Tienen un trabajo más variado en relación a otros especialistas: 12345

Tratan fundamentalmente con fármacos tópicos: 12345

Tratan fundamentalmente con cirugía: 1234 5

Tratan fundamentalmente con cosméticos o físicos (láser..): 12345

Tratan fundamentalmente con fármacos sistémicos: 12345

Son innovadores: 12345

17.-¿ Por qué cree que es una de las especialidades más demandadas en el MIR?

18.- ¿Has tenido alguna experiencia personal con la Dermatología? No; Sí: Como paciente. Como familiar

Indica la patología si lo desea:

19.- Qué es lo que más te ha gustado de la asignatura:

20.- Qué es lo que menos te ha gustado de la asignatura:

21.-Deseas realizar algún comentario o propuesta para el desarrollo de la asignatura

Muchas gracias por tu colaboración
